# Supplementary material for: Variation in Copepod Morphological and Life History Traits along a Vertical Gradient of Freshwater Habitats
Source: MDPI journal article supplement (doi:10.3390/environments10120199), 2023-11-22
Supplement: s1 [file s1]

**Table S1.** Values of morphological and life history traits per site in the four habitats. White spaces represent the unavailability of the trait value for that site. Traits #3, 4, 6, 7, 8, and 12 were not measured at the hyporheic zone habitat sites. The SB/nSB ratio (Ecology) was not calculated for the fluvial benthos and littoral region habitats, as all individuals were non-stygobite. A = alluvial aquifer of Vomano River; HZ = hyporheic zone of Rio Gamberale creek; R = benthic layers of the Tiber River; L = littoral region of Lake Maggiore. Biomass is expressed in ng of dry C and abundances in number of individuals.

|         |      | Trait 1                 | Trait 2                   | Trait 3                           | Trait 4          | Trait 5              | Trait 6           | Trait 7                        | Trait 8              | Trait 9             | Trait 10                           | Trait 11                        | Trait 12                        | Ecology                                     |
|---------|------|-------------------------|---------------------------|-----------------------------------|------------------|----------------------|-------------------|--------------------------------|----------------------|---------------------|------------------------------------|---------------------------------|---------------------------------|---------------------------------------------|
| Habitat | Site | Cumulative biomass (ng) | Biomass of juveniles (ng) | Biomass of ovigerous females (ng) | Egg biomass (ng) | Body size dimorphism | Relative egg size | Egg volume ( $\mu\text{m}^3$ ) | Number of eggs / sac | Number of juveniles | Ratio of juvenile/adult abundances | Ratio of male/female abundances | Percentage of ovigerous females | Ratio of stygobite/non-stygobite abundances |
| A       | A1   | 81142                   | 14613                     | 3775                              | 5                | 0.79                 | 0.0012            | 120444                         | 18.67                | 15                  | 0.55                               | 1.31                            | 25.00                           | 0.02                                        |
| A       | A2   | 13468                   | 9858                      | 0                                 | 0                | 1.06                 |                   |                                |                      | 8                   | 2.25                               | 1.50                            | 0.00                            | 0.08                                        |
| A       | A3   | 997                     | 267                       | 0                                 | 0                |                      |                   |                                |                      | 1                   | 1.00                               | 2.00                            |                                 | 3.00                                        |
| A       | A4   | 65946                   | 21167                     | 0                                 | 0                | 0.80                 |                   |                                |                      | 18                  | 1.19                               | 1.43                            | 0.00                            | 0.03                                        |
| A       | A5   | 12880                   | 3845                      | 0                                 | 0                | 0.89                 |                   |                                |                      | 15                  | 0.67                               | 0.61                            | 0.00                            | 7.80                                        |
| A       | A6   | 7296                    | 2309                      | 0                                 | 0                | 0.87                 |                   |                                |                      | 12                  | 0.50                               | 1.15                            | 0.00                            | 38.00                                       |
| A       | A7   | 1130                    | 0                         | 0                                 | 0                | 1.11                 |                   |                                |                      | 0                   |                                    | 1.33                            | 0.00                            | 6.00                                        |
| A       | A8   | 626                     | 0                         | 0                                 | 0                |                      |                   |                                |                      | 0                   |                                    | 0.33                            | 0.00                            | 3.00                                        |
| A       | A9   | 48932                   | 21167                     | 0                                 | 0                | 0.98                 |                   |                                |                      | 24                  | 0.93                               | 0.87                            | 0.00                            | 51.00                                       |
| A       | A10  | 242714                  | 152926                    | 0                                 | 0                |                      |                   |                                |                      | 33                  | 17.00                              | 0.50                            | 0.00                            | 0.09                                        |
| A       | A11  | 6319                    | 4799                      | 0                                 | 0                |                      |                   |                                |                      | 6                   | 3.50                               | 2.00                            |                                 | 0.13                                        |
| A       | A12  | 13735                   | 3547                      | 0                                 | 0                | 0.90                 |                   |                                |                      | 2                   | 0.60                               | 2.67                            | 0.00                            | 2.00                                        |
| A       | A13  | 50823                   | 20113                     | 0                                 | 0                | 0.69                 |                   |                                |                      | 13                  | 0.93                               | 0.22                            | 0.00                            | 0.04                                        |
| A       | A14  | 7629                    | 4828                      | 0                                 | 0                | 0.83                 |                   |                                |                      | 6                   | 2.33                               | 3.00                            |                                 | 0.11                                        |
| A       | A15  | 129209                  | 25973                     | 0                                 | 0                | 0.73                 |                   |                                |                      | 25                  | 0.43                               | 1.03                            | 0.00                            | 0.01                                        |
| A       | A16  | 37081                   | 5448                      | 1804                              | 4                | 0.87                 | 0.0022            | 109710                         | 6.00                 | 8                   | 0.47                               | 0.57                            | 7.69                            | 0.22                                        |
| A       | A18  | 58278                   | 5874                      | 0                                 | 0                |                      |                   |                                |                      | 5                   | 0.40                               | 4.17                            | 0.00                            | 17.00                                       |
| A       | A20  | 524                     | 524                       | 0                                 | 0                |                      |                   |                                |                      | 1                   | 2.00                               |                                 |                                 | 0.50                                        |
| A       | A21  | 21050                   | 9709                      | 0                                 | 0                |                      |                   |                                |                      | 7                   | 2.67                               | 3.00                            | 0.00                            | 14.00                                       |
| A       | A22  | 418513                  | 69671                     | 4719                              | 12               | 0.85                 | 0.0026            | 312898                         | 2.00                 | 34                  | 0.48                               | 0.60                            | 4.08                            | 1.38                                        |
| A       | A23  | 56413                   | 342                       | 0                                 | 0                | 0.87                 |                   |                                |                      | 1                   | 0.40                               | 1.17                            | 0.00                            | 0.75                                        |
| A       | A24  | 24985                   | 1871                      | 0                                 | 0                |                      |                   |                                |                      | 1                   | 0.25                               | 0.13                            | 0.00                            | 9.00                                        |
| A       | A27  | 220571                  | 27475                     | 0                                 | 0                | 0.85                 |                   |                                |                      | 21                  | 0.30                               | 1.31                            | 0.00                            | 0.80                                        |
| A       | A28  | 18626                   | 6424                      | 0                                 | 0                | 0.97                 |                   |                                |                      | 9                   | 1.43                               | 1.55                            | 0.00                            | 6.40                                        |
| A       | A29  | 21722                   | 3805                      | 0                                 | 0                | 0.83                 |                   |                                |                      | 2                   | 0.50                               | 0.40                            | 0.00                            | 0.13                                        |
| A       | A30  | 448                     | 251                       | 0                                 | 0                |                      |                   |                                |                      | 1                   | 1.00                               | 2.00                            |                                 | 3.00                                        |
| A       | A32  | 310                     | 0                         | 0                                 | 0                |                      |                   |                                |                      | 0                   |                                    | 2.00                            |                                 | 2.00                                        |
| A       | A33  | 82408                   | 29109                     | 1749                              | 5                | 0.89                 | 0.0026            | 123822                         | 16.00                | 15                  | 0.55                               | 1.00                            | 7.14                            | 0.02                                        |
| A       | A34  | 111309                  | 15925                     | 0                                 | 0                | 1.03                 |                   |                                |                      | 12                  | 0.68                               | 0.88                            | 0.00                            | 4.25                                        |
| A       | A35  | 46693                   | 15084                     | 0                                 | 0                | 0.87                 |                   |                                |                      | 8                   | 1.13                               | 0.43                            | 0.00                            | 17.00                                       |
| A       | A36  | 552465                  | 139342                    | 12197                             | 1                | 0.69                 | 8.43E-07          | 278                            | 60.00                | 37                  | 0.67                               | 0.93                            | 3.45                            | 0.01                                        |
| A       | A37  | 244473                  | 51130                     | 2466                              | 1.92             | 0.94                 | 0.0008            | 51979                          | 8.00                 | 21                  | 0.35                               | 0.68                            | 18.92                           | 0.01                                        |
| A       | A38  | 84628                   | 23362                     | 0                                 | 0                | 0.82                 |                   |                                |                      | 17                  | 0.86                               | 0.47                            | 0.00                            | 0.03                                        |
| A       | A40  | 120158                  | 17119                     | 0                                 | 0                |                      |                   |                                |                      | 20                  | 0.54                               | 0.90                            | 0.00                            | 0.02                                        |
| A       | A41  | 13847                   | 1742                      | 0                                 | 0                | 0.85                 |                   |                                |                      | 1                   | 0.50                               | 0.25                            | 0.00                            | 5.00                                        |
| A       | A42  | 104382                  | 9980                      | 2603                              | 3.96             | 0.95                 | 0.0016            | 107009                         | 12.00                | 12                  | 0.48                               | 0.53                            | 32.14                           | 0.02                                        |
| A       | A43  | 437                     | 437                       | 0                                 | 0                |                      |                   |                                |                      | 1                   | 2.00                               |                                 |                                 | 0.50                                        |
| A       | A44  | 165574                  | 27654                     | 0                                 | 0                | 0.86                 |                   |                                |                      | 19                  | 0.59                               | 0.84                            | 0.00                            | 53.00                                       |
| A       | A45  | 6430                    | 6430                      | 0                                 | 0                |                      |                   |                                |                      | 9                   | 10.00                              |                                 |                                 | 4.50                                        |

|         |        | Trait 1                 | Trait 2                   | Trait 3                           | Trait 4          | Trait 5              | Trait 6           | Trait 7                        | Trait 8              | Trait 9             | Trait 10                           | Trait 11                        | Trait 12                        | Ecology                                     |
|---------|--------|-------------------------|---------------------------|-----------------------------------|------------------|----------------------|-------------------|--------------------------------|----------------------|---------------------|------------------------------------|---------------------------------|---------------------------------|---------------------------------------------|
| Habitat | Site   | Cumulative biomass (ng) | Biomass of juveniles (ng) | Biomass of ovigerous females (ng) | Egg biomass (ng) | Body size dimorphism | Relative egg size | Egg volume ( $\mu\text{m}^3$ ) | Number of eggs / sac | Number of juveniles | Ratio of juvenile/adult abundances | Ratio of male/female abundances | Percentage of ovigerous females | Ratio of stygobite/non-stygobite abundances |
| A       | A46    | 1481                    | 1481                      | 0                                 | 0                |                      |                   |                                |                      | 1                   | 2.00                               |                                 |                                 | 0.50                                        |
| A       | A48    | 147753                  | 43186                     | 0                                 | 0                | 0.93                 |                   |                                |                      | 41                  | 0.56                               | 0.57                            | 0.00                            | 131.00                                      |
| A       | A49    | 3958                    | 299                       | 0                                 | 0                | 0.91                 |                   |                                |                      | 1                   | 0.67                               | 1.67                            | 0.00                            | 8.00                                        |
| A       | A50    | 904                     | 817                       | 0                                 | 0                | 1.26                 |                   |                                |                      | 6                   | 2.33                               | 1.00                            | 0.00                            | 1.00                                        |
| A       | A51    | 602                     | 0                         | 0                                 | 0                | 1.18                 |                   |                                |                      | 0                   |                                    | 1.00                            | 0.00                            | 3.00                                        |
| A       | A52    | 5929                    | 1005                      | 0                                 | 0                | 1.16                 |                   |                                |                      | 4                   | 1.67                               | 4.50                            | 0.00                            | 15.00                                       |
| A       | A57    | 74508                   | 11016                     | 0                                 | 0                | 0.80                 |                   |                                |                      | 12                  | 0.35                               | 2.82                            | 0.00                            | 53.00                                       |
| A       | A58    | 655                     | 0                         | 0                                 | 0                |                      |                   |                                |                      | 0                   |                                    | 0.50                            | 0.00                            | 2.00                                        |
| A       | A59    | 2512                    | 0                         | 0                                 | 0                | 1.03                 |                   |                                |                      | 0                   |                                    | 0.33                            | 0.00                            | 1.00                                        |
| A       | A59bis | 20579                   | 4662                      | 0                                 | 0                |                      |                   |                                |                      | 4                   | 0.42                               | 6.00                            | 0.00                            | 17.00                                       |
| A       | A60    | 109054                  | 37916                     | 0                                 | 0                | 0.79                 |                   |                                |                      | 18                  | 0.56                               | 0.73                            | 0.00                            | 0.02                                        |
| A       | A61    | 429011                  | 104481                    | 10191                             | 5                | 1.06                 | 0.0005            | 130964                         | 32.00                | 33                  | 0.64                               | 1.75                            | 5.26                            | 0.01                                        |
| A       | A63    | 4314                    | 0                         | 0                                 | 0                |                      |                   |                                |                      | 0                   |                                    | 0.33                            | 0.00                            | 3.00                                        |
| A       | A64    | 4980                    | 0                         | 0                                 | 0                | 0.76                 |                   |                                |                      | 0                   |                                    | 1.00                            | 0.00                            | 3.00                                        |
| A       | A65    | 107899                  | 11258                     | 0                                 | 0                | 0.95                 |                   |                                |                      | 7                   | 0.53                               | 0.60                            |                                 | 0.28                                        |
| HZ      | HZ1    | 18398                   | 4867                      |                                   |                  | 1.19                 |                   |                                |                      | 4                   | 5.00                               | 0.36                            |                                 | 0.27                                        |
| HZ      | HZ2    | 19449                   | 7471                      |                                   |                  | 1.10                 |                   |                                |                      | 8                   | 1.80                               | 0.63                            |                                 | 0.05                                        |
| HZ      | HZ3    | 38801                   | 1044                      |                                   |                  | 0.92                 |                   |                                |                      | 2                   | 0.60                               | 0.36                            |                                 | 0.06                                        |
| HZ      | HZ4    | 150056                  | 19688                     |                                   |                  | 1.00                 |                   |                                |                      | 27                  | 0.34                               | 0.61                            |                                 | 0.38                                        |
| HZ      | HZ5    | 323936                  | 30387                     |                                   |                  | 0.88                 |                   |                                |                      | 19                  | 0.29                               | 0.73                            |                                 | 0.08                                        |
| R       | M-R1   | 121114                  | 35894                     | 2705                              | 30               | 0.98                 | 0.0030            | 68684                          | 15.17                | 80                  | 0.64                               | 0.30                            | 10.75                           |                                             |
| R       | M-R2   | 131885                  | 34813                     | 3001                              | 10               | 0.90                 | 0.0045            | 102717                         | 13.75                | 72                  | 0.68                               | 0.36                            | 17.33                           |                                             |
| R       | M-R3   | 137801                  | 38036                     | 4404                              | 7                | 0.88                 | 0.0014            | 28817                          | 13.22                | 73                  | 0.59                               | 0.49                            | 17.07                           |                                             |
| R       | V-R1   | 285610                  | 53136                     | 2890                              | 5                | 0.92                 | 0.0026            | 45251                          | 13.27                | 115                 | 0.69                               | 0.29                            | 12.61                           |                                             |
| R       | V-R2   | 87694                   | 20577                     | 7200                              | 16               | 1.00                 | 0.0021            | 70849                          | 13.43                | 52                  | 0.53                               | 0.49                            | 16.98                           |                                             |
| R       | V-R3   | 186848                  | 38747                     | 4920                              | 12               | 0.92                 | 0.0028            | 50806                          | 14.06                | 89                  | 0.53                               | 0.37                            | 13.11                           |                                             |
| L       | MA:D   | 501129                  | 251411                    | 5596                              | 8                | 0.94                 | 0.0017            | 46992                          | 17.00                | 343                 | 1.11                               | 0.41                            | 9.41                            |                                             |
| L       | MA:W   | 155789                  | 56268                     | 6599                              | 7                | 0.87                 | 0.0016            | 72232                          | 13.75                | 153                 | 1.14                               | 0.44                            | 18.37                           |                                             |
| L       | SC:D   | 90751                   | 41207                     | 0                                 | 0                | 0.93                 |                   |                                |                      | 137                 | 1.75                               | 1.43                            | 0.00                            |                                             |
| L       | SC:W   | 511378                  | 80729                     | 2920                              | 7                | 0.98                 | 0.0020            | 36115                          | 16.80                | 173                 | 0.70                               | 0.50                            | 26.27                           |                                             |
| L       | FT:D   | 266710                  | 106492                    | 3497                              | 4                | 0.97                 | 0.0013            | 35354                          | 15.18                | 133                 | 0.61                               | 0.76                            | 17.58                           |                                             |
| L       | FT:W   | 124513                  | 27445                     | 1217                              | 3                | 1.00                 | 0.0022            | 80445                          | 11.50                | 64                  | 0.41                               | 0.48                            | 7.55                            |                                             |

**Table S2.** PERMDISP, PERMANOVA and pair-wise test results for the twelve morphological and life history traits. In bold, the statistically significant p-values ( $p > 0.005$ ). A = alluvial aquifer of Vomano River; HZ = hyporheic zone of Rio Gamberale creek; R = benthic layers of the Tiber River; L = littoral region of Lake Maggiore. Ha: habitat (factor); res: residuals.

|    | Trait                              | Degrees of freedom | PERMDISP |                  | PERMANOVA       |                | PAIR-WISE TESTS |          |                |
|----|------------------------------------|--------------------|----------|------------------|-----------------|----------------|-----------------|----------|----------------|
|    |                                    | <i>ha, res</i>     | <i>F</i> | <i>P(tables)</i> | <i>Pesudo-F</i> | <i>P(perm)</i> | <i>Groups</i>   | <i>t</i> | <i>P(perm)</i> |
| 1  | Cumulative biomass                 | 3, 64              | 5.17     | <b>0.003</b>     | 4.47            | <b>0.008</b>   | A, L            | 2.62     | <b>0.008</b>   |
|    |                                    |                    |          |                  |                 |                | A, HZ           | 1.26     | 0.213          |
|    |                                    |                    |          |                  |                 |                | A, R            | 2.30     | <b>0.026</b>   |
|    |                                    |                    |          |                  |                 |                | L, HZ           | 2.21     | 0.066          |
|    |                                    |                    |          |                  |                 |                | L, R            | 1.82     | 0.248          |
|    |                                    |                    |          |                  |                 |                | HZ, R           | 1.76     | 0.134          |
| 2  | Biomass of juveniles               | 3, 67              | 1.82     | 0.105            | 1.62            | 0.137          |                 |          |                |
| 3  | Biomass of ovigerous females       | 2, 63              | 0.43     | 0.648            | 24.17           | <b>0.001</b>   | A, L            | 4.36     | <b>0.001</b>   |
|    |                                    |                    |          |                  |                 |                | A, R            | 5.78     | <b>0.001</b>   |
|    |                                    |                    |          |                  |                 |                | L, R            | 1.02     | 0.321          |
| 4  | Egg biomass                        | 2, 63              | 0.53     | 0.5909           | 36.27           | <b>0.001</b>   | A, L            | 4.92     | <b>0.001</b>   |
|    |                                    |                    |          |                  |                 |                | A, R            | 7.54     | <b>0.001</b>   |
|    |                                    |                    |          |                  |                 |                | L, R            | 1.78     | <b>0.034</b>   |
| 5  | Body size dimorphism               | 3, 124             | 2.07     | 0.1162           | 1.57            | 0.208          |                 |          |                |
| 6  | Relative egg size                  | 2, 16              | 2.80     | 0.090            | 1.57            | 0.125          |                 |          |                |
| 7  | Egg volume                         | 2, 16              | 0.58     | 0.556            | 0.13            | 1              |                 |          |                |
| 8  | Number of eggs / sac               | 2, 16              | 4.9      | <b>0.022</b>     | 0.46            | 0.753          |                 |          |                |
| 9  | Number of juveniles                | 3, 67              | 4.48     | <b>0.006</b>     | 8.58            | <b>0.001</b>   | A, L            | 3.72     | <b>0.002</b>   |
|    |                                    |                    |          |                  |                 |                | A, HZ           | 0.84     | 0.432          |
|    |                                    |                    |          |                  |                 |                | A, R            | 3.29     | <b>0.005</b>   |
|    |                                    |                    |          |                  |                 |                | L, HZ           | 4.85     | <b>0.002</b>   |
|    |                                    |                    |          |                  |                 |                | L, R            | 2.16     | 0.093          |
|    |                                    |                    |          |                  |                 |                | HZ, R           | 2.63     | <b>0.034</b>   |
| 10 | Ratio of juvenile/adult abundances | 3, 62              | 2.74     | 0.051            | 0.64            | 0.648          |                 |          |                |
| 11 | Ratio of male/female abundances    | 3, 64              | 3.08     | <b>0.034</b>     | 4.46            | <b>0.004</b>   | A, L            | 1.47     | 0.125          |
|    |                                    |                    |          |                  |                 |                | A, HZ           | 1.78     | 0.07           |
|    |                                    |                    |          |                  |                 |                | A, R            | 2.93     | <b>0.001</b>   |
|    |                                    |                    |          |                  |                 |                | L, HZ           | 0.52     | 0.693          |

| Trait |                                 | Degrees of freedom | PERMDISP |                  | PERMANOVA       |                | PAIR-WISE TESTS |          |                |
|-------|---------------------------------|--------------------|----------|------------------|-----------------|----------------|-----------------|----------|----------------|
|       |                                 | <i>ha, res</i>     | <i>F</i> | <i>P(tables)</i> | <i>Pesudo-F</i> | <i>P(perm)</i> | <i>Groups</i>   | <i>t</i> | <i>P(perm)</i> |
|       |                                 |                    |          |                  |                 |                | L, R            | 2.12     | <b>0.038</b>   |
|       |                                 |                    |          |                  |                 |                | HZ, R           | 1.82     | 0.108          |
| 12    | Percentage of ovigerous females | 2, 53              | 1.68     | 0.165            | 13.9            | <b>0.001</b>   | A, L            | 3.54     | <b>0.001</b>   |
|       |                                 |                    |          |                  |                 |                | A, R            | 4.39     | <b>0.009</b>   |
|       |                                 |                    |          |                  |                 |                | L, R            | 0.36     | <b>0.722</b>   |

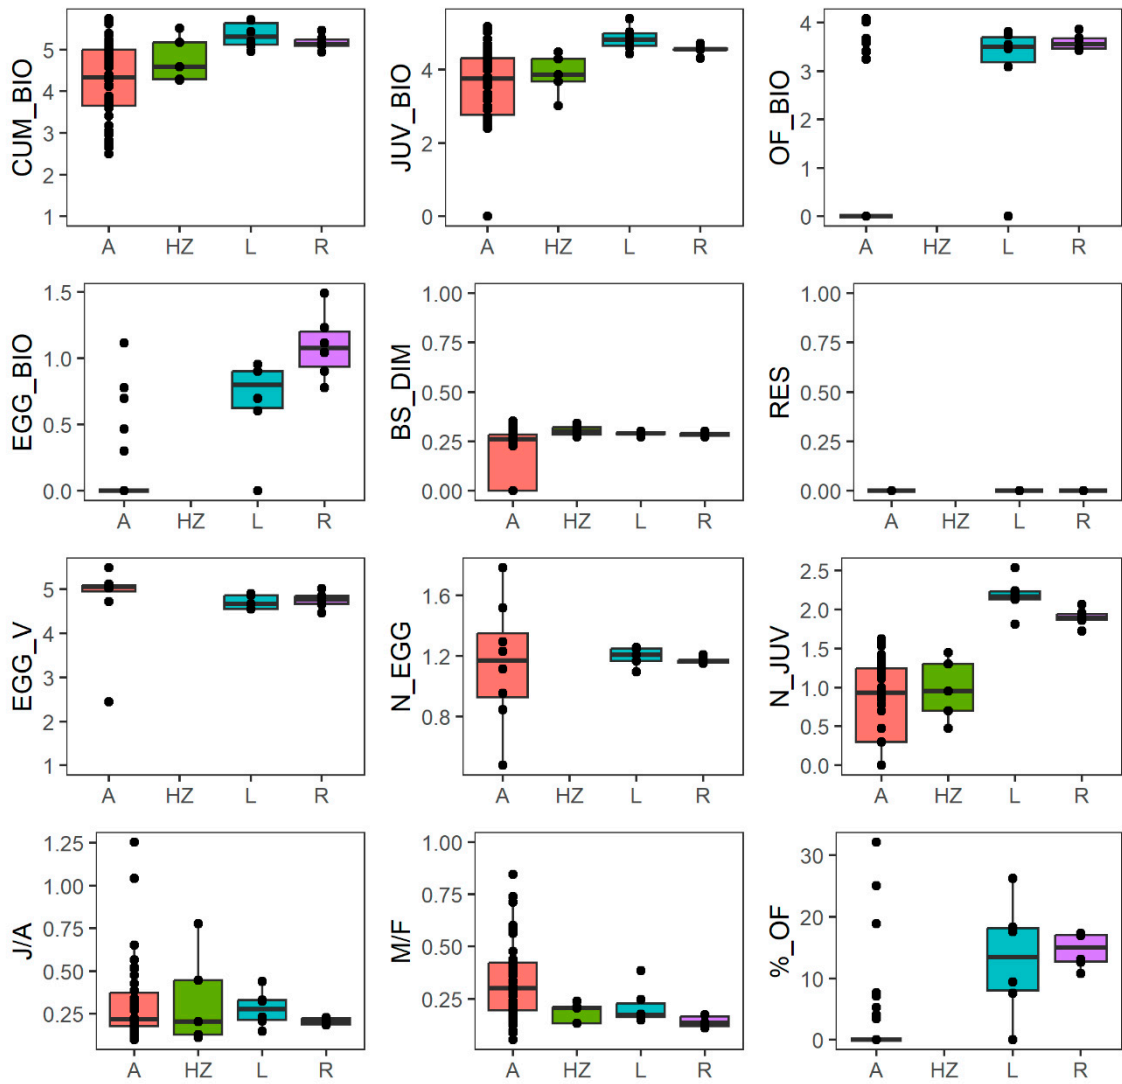

**Figure S1.** Box plots showing the median (horizontal lines), the first and third quartiles (box spans), and the sampling sites (black dots) of the twelve functional traits analyzed in this research. All values were  $\log(x+1)$ -transformed, except for Trait #12 (bottom right box), which shows percentage values. A = alluvial aquifer of Vomano River; HZ = hyporheic zone of Rio Gamberale Creek; R = benthic layers of the Tiber River; L = littoral zone of Lake Maggiore. CUM\_BIO = Cumulative biomass (ng); JUV\_BIO = Biomass of juveniles (ng); OF\_BIO = Biomass of ovigerous females (ng); EGG\_BIO = Egg biomass (ng); BS\_DIM = Body size dimorphism; RES = Relative egg size; EGG\_V = Egg volume ( $\mu\text{m}^3$ ); N\_EGG = Number of eggs / sac; N\_JUV = Number of juveniles; J/A = Ratio of juvenile/adult abundances; M/F = Ratio of male/female abundances; %\_OF = Percentage of ovigerous females.
